# Supplementary material
Source: PubMed Central journal article supplement (PMC4812767)
Supplement: pnas.1523436113.sapp.pdf [file pnas.1523436113.sapp.pdf]

# Supporting Information

## SI materials and methods

**Cell culture.** The NPC cell lines, HONE1, HK1, C666 and the immortalized nasopharyngeal (NP) epithelial cell lines, NP69 and NP460, were obtained from the Cell Line Repository of the Area of Excellence, Center for NPC Research (CNPCR). All the NPC and immortalized cell lines were cultured as previously described (1). Growth medium for all cell lines consisted of DMEM supplemented with 10% (vol/vol) fetal calf serum.

**Real-time quantitative reverse transcription PCR (QPCR).** The QPCR was performed by utilizing the FastStart Universal SYBR green master mix as described (2). The QPCR primers are forward: 5'-TAT CCT GCA GGT GGA GCT G-3' and reverse: 5'-ATG AAA TGC CAT GCC CTT AG-3' for full-length *MST1R* (MST1R FL) (3) and forward: 5'-CCT CAT GAC CCT CTC TGC AGT-3' and reverse: 5'- CTG GCA GCT CTC ACC ACC-3' for *MST1R* short isoform (MST1R SF). The primer set for short isoform was designed to target a 90 bp region from intron 10 to exon 11.

**Immunohistochemical staining (IHC).** NPC tissue microarray (TMA) construction and IHC were performed using the standard streptavidin-biotin-peroxidase complex method as previously described (1). The TMA slides were incubated with rabbit anti-RON  $\beta$  polyclonal antibody (C-20, Santa Cruz, CA, USA, 1:100 dilution) overnight. The TMA results were reviewed by a pathologist (F.C.).

**Illumina Infinium assay for methylation profiling.** The NPC methylome data assayed on Illumina HumanMethylation450 BeadChip were processed as described previously (4) and are available in the NCBI GEO database with accession ID GSE62336 (4). The normalized methylation data of the selected locus in the morphologically normal tissues obtained from breast, kidney, liver, lung, prostate, head and neck and bladder cancer patients were generated by The Cancer Genome Atlas (TCGA) studies and obtained in the MARMAL-AID database (5). The normalized methylation data of the selected locus in peripheral blood mononuclear cells (PBMCs) were obtained from MARMAL-AID database.

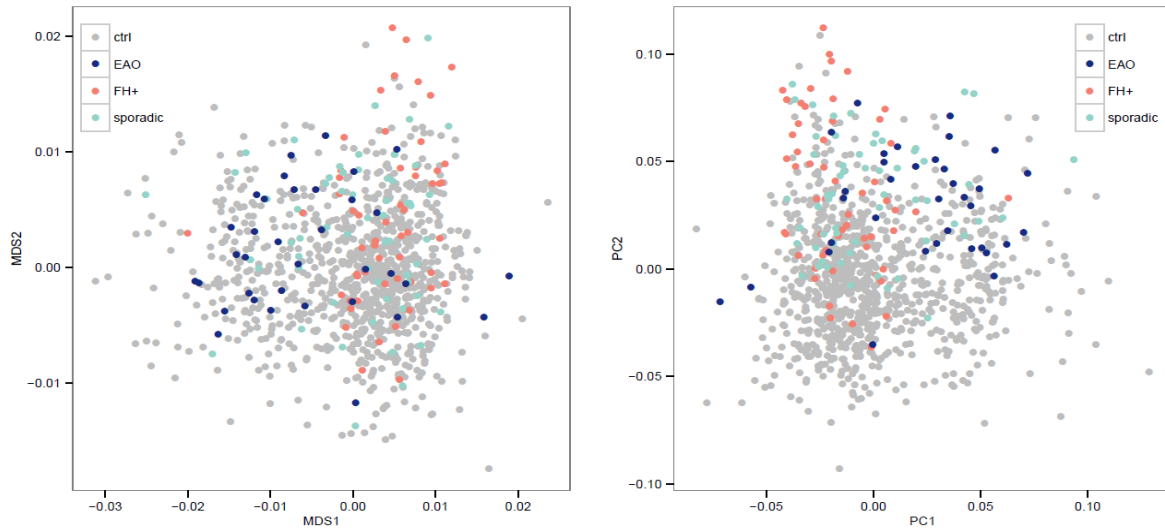

**Fig. S1:** The multi-dimensional scaling and principal component analysis of the samples sequenced by WES. The graph includes 39 EAO patients, 63 FH+ patients from 52 families, 59 sporadic patients, and 895 non-cancer controls.

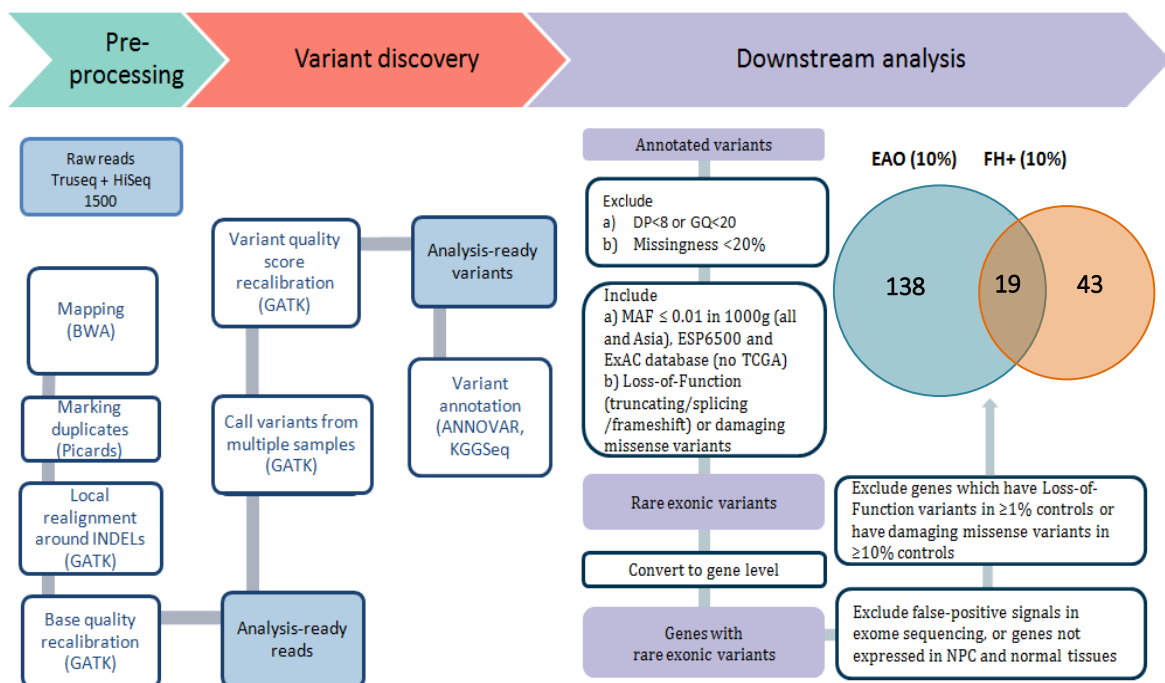

**Fig. S2:** Workflow for identification of the genes with deleterious variants in at least 10% of the cases in either EAO or FH+ group using filtering strategy.

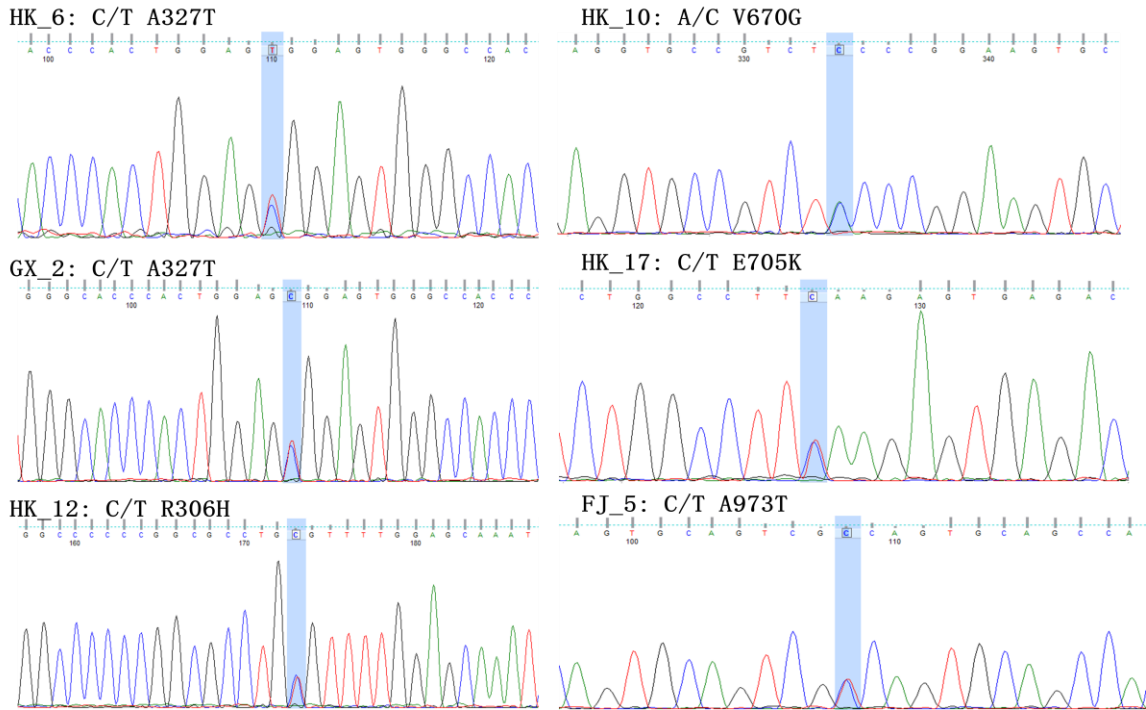

**Fig. S3:** Validation of the deleterious variants at *MSTIR* in the EAO cases by Sanger sequencing

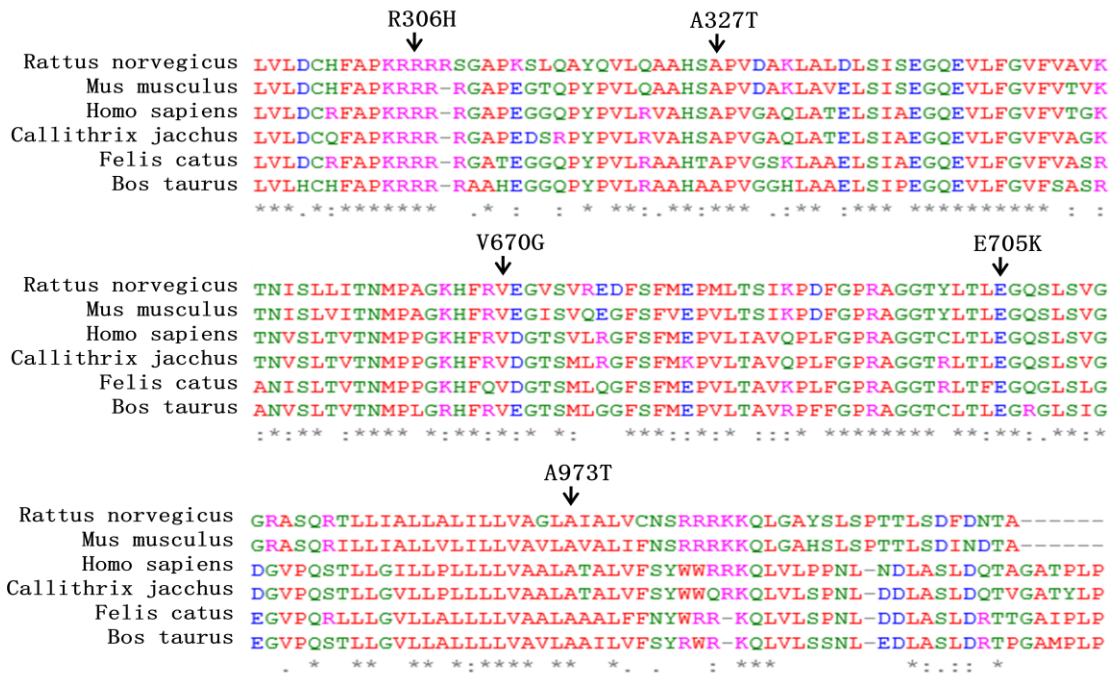

**Fig. S4:** Multiple alignment showed the evolutionary conservation of residues, where the rare deleterious variants in the EAO cases occurred. Multiple alignment was done by Clustal Omega (EBI).

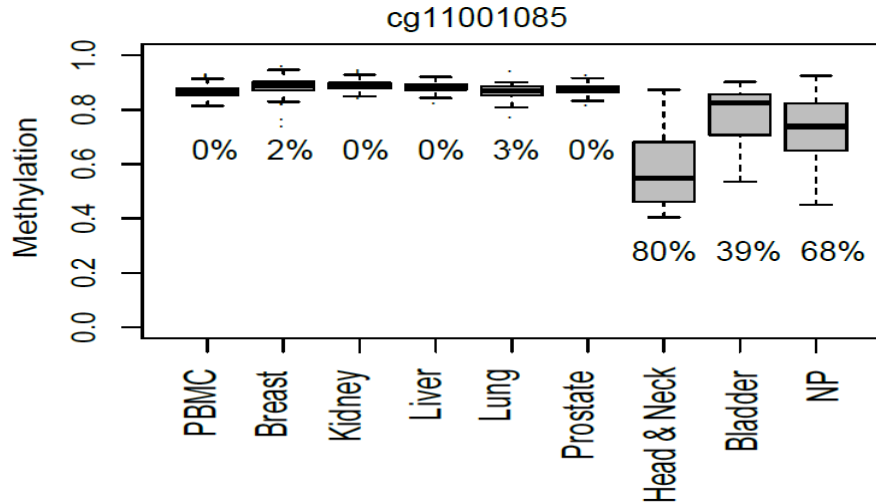

**Fig. S5:** Methylation of the CpG site (cg11001085, chr3: 49940126) within the CGI 2 in the peripheral blood mononuclear cell (PBMC) (n=400) and the morphologically normal tissues from breast (n=98), kidney (n=185), liver (n=50), lung (n=75), prostate (n=45), head and neck (n=50), bladder (n=18), and nasopharynx (NP) (n=25). The cytosine in this CpG site is located at the same genomic location as the variant c.G917A:p.R306H. A dramatic decrease of methylation of this CpG site was observed in head and neck, bladder, and NP tissues, indicating there is a tissue-specific methylation pattern at this locus. The percentage of the samples with reduced methylation level (<0.8) at this locus is listed on the graph. The solid points are the outliers.

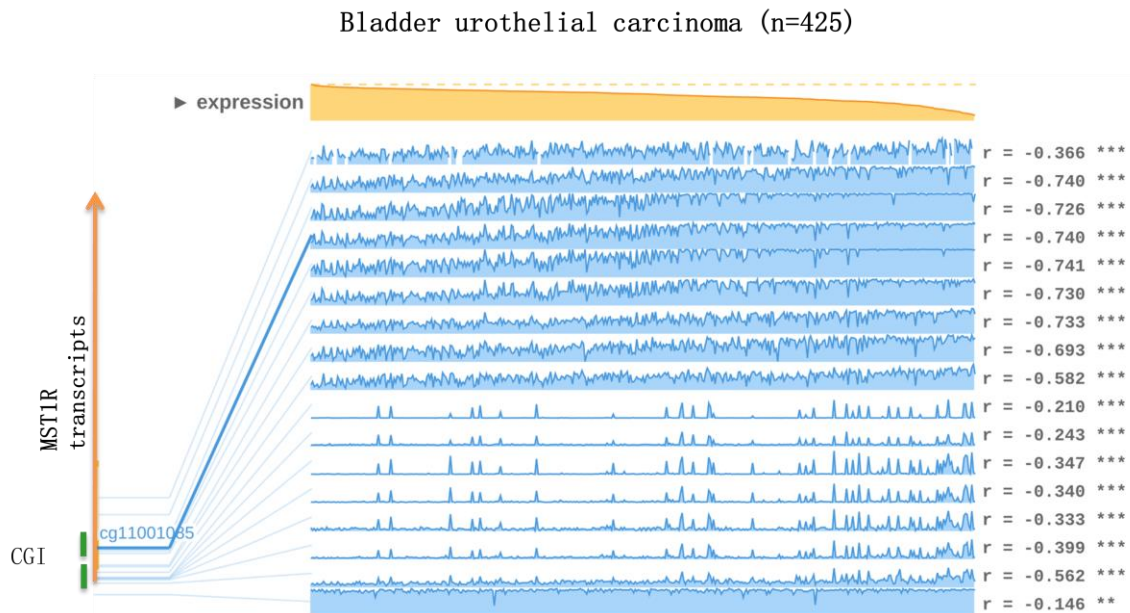

**Fig. S6:** Correlation between *MST1R* methylation and expression in bladder urothelial carcinoma in TCGA study (n=425). Increased methylation of the CpG site at cg11011085 was correlated with decreased *MST1R* expression.

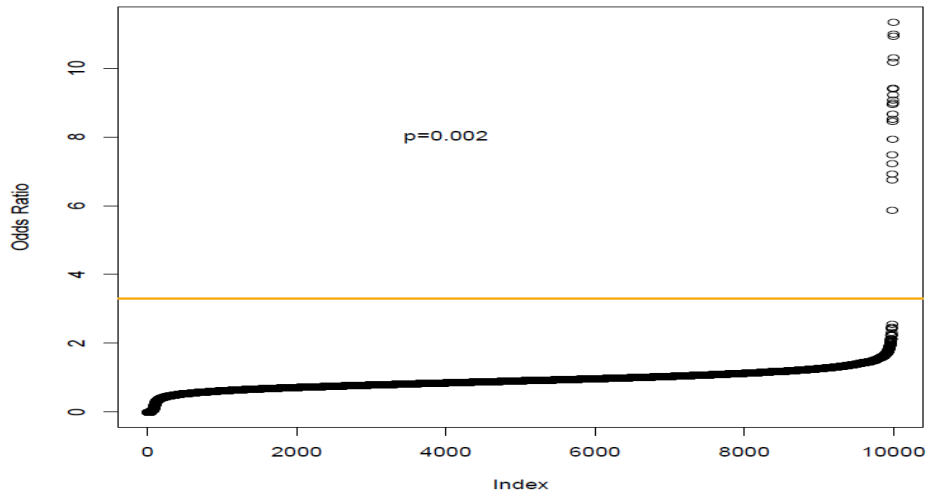

**Fig. S7:** Permutation test by Monte Carlo method for estimating the probability of observing the association of deleterious variants in 10 randomly selected genes with NPC by chance. The orange line indicates the odds ratio of 3.3 as we observed in the MST1R interaction network. The permutation test was done for 10000 times. The chance that we observed odd ratios > 3.3 for 10 randomly selected genes is only 0.002 (20/10000).

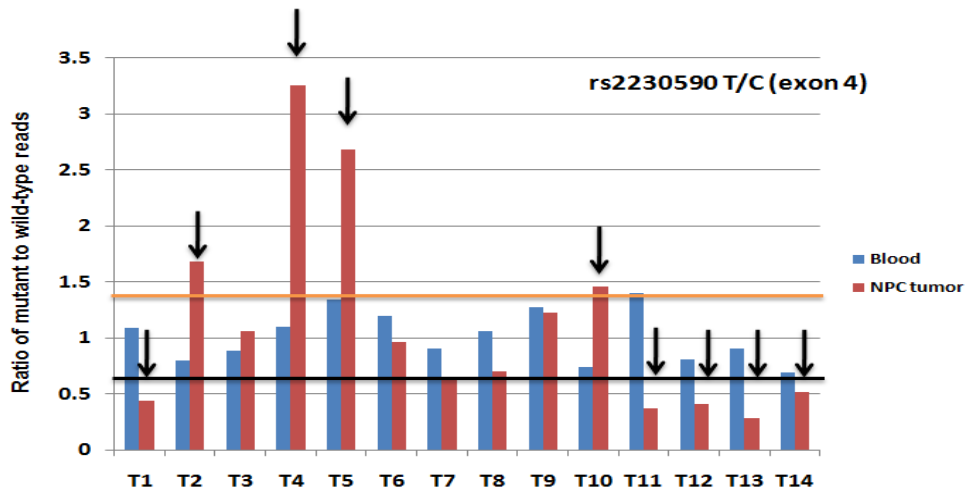

**Fig. S8:** The ratio of the reads for the mutant allele to the wild-type allele of a common missense variant c.A1568G:p.Q523R (rs2230590) at *MST1R*. This variant was found in 14 out of 59 NPC patients. The average coverage at this locus is 78X in tumors and 58X in blood, respectively. The cut-off for the allelic imbalance was determined by the ratios in the blood samples (mean  $\pm$  2SD). The orange line is the upper cut-off (1.43) and the black line is the lower cut-off (0.59). The NPC tumors with the ratio higher or lower than the cut-off are highlighted by an arrow. The increased ratio of the reads for the mutant to wild-type allele indicates loss of the wild-type allele or gain of the mutant allele and *vice-versa*. In total, 9/14 (64%) patients have an allelic imbalance of copy numbers at this selected locus.

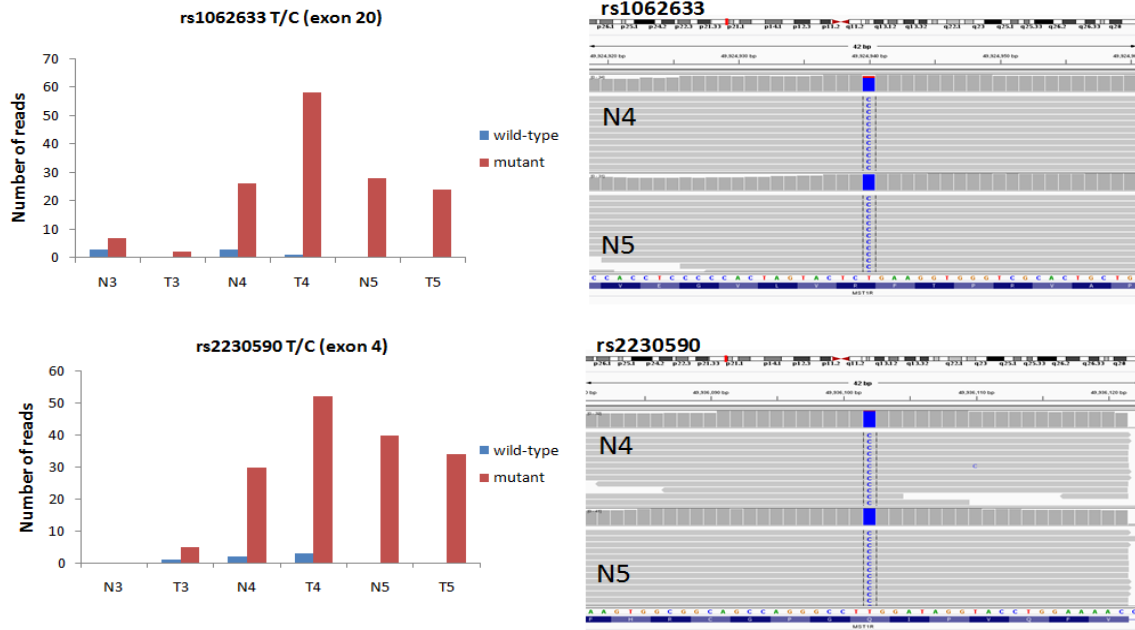

**Fig. S9:** Expression of mutant and wild-type *MST1R* alleles at two *MST1R* common variants c.A1568G:p.Q523R (rs2230590) and c.A4003G:p.R1335G (rs1062633). Left: Barplot of the number of reads from wild-type and mutant alleles in RNASeq data. T is the wild-type allele and C is the mutant allele. Only cases 3, 4 and 5 carry the variant rs1062633 and rs102230590 out of 10 patients in RNASeq. Right: The visualization of the reads near rs1062633 and rs2230590 in RNASeq data by Integrative Genomics Viewer (IGV). The mutant allele C is predominantly expressed in the normal surrounding tissues from two cases. N: non-tumor surrounding samples. T: NPC tumors.

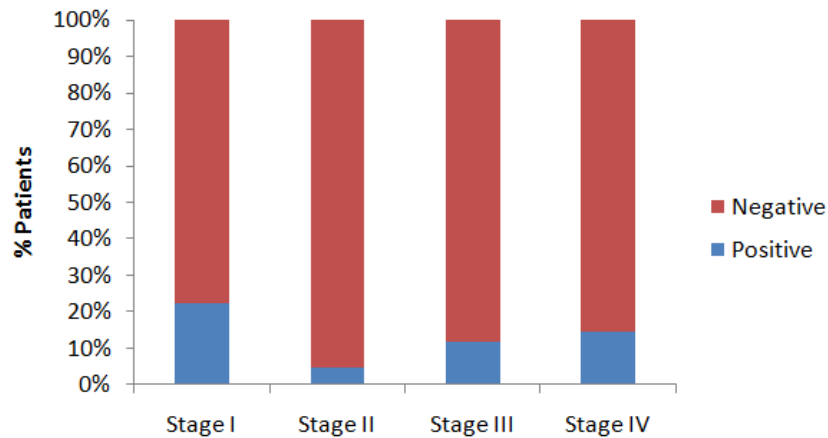

**Fig. S10:** *MST1R* expression in NPC by IHC staining using rabbit anti-RON  $\beta$  polyclonal antibody (C-20, 1:100 dilution). Negative: no *MST1R* expression. Positive: weak (+) to moderate (++) *MST1R* expression

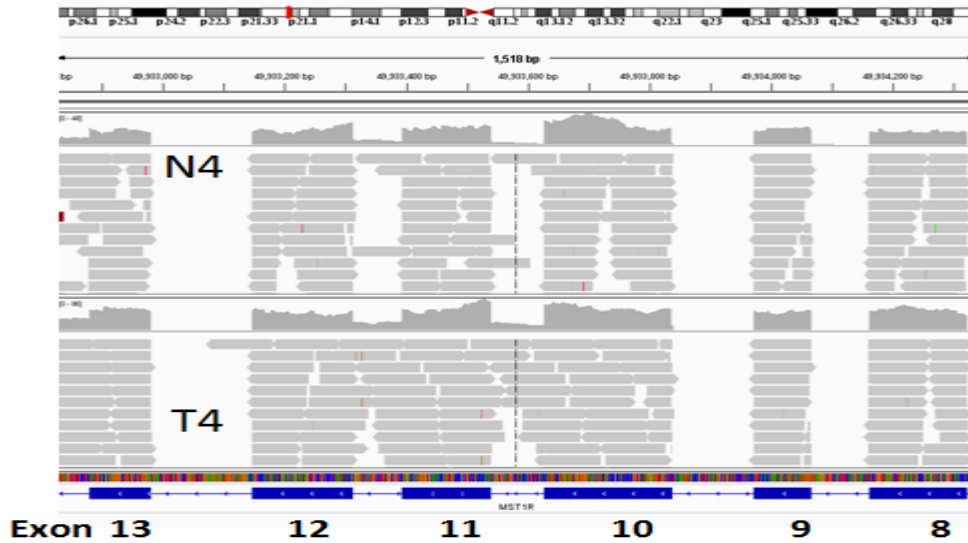

**Fig. S11:** Visualization of the reads in *MST1R* from exon 8 to 13 by Integrative Genomics Viewer (IGV) in one pair of samples (N4 vs. T4). The *MST1R* short-isoform transcript starts from intron 10. We detected reads in both introns 10 and 11 for the short-isoform transcript, which is consistent with previous study (3).

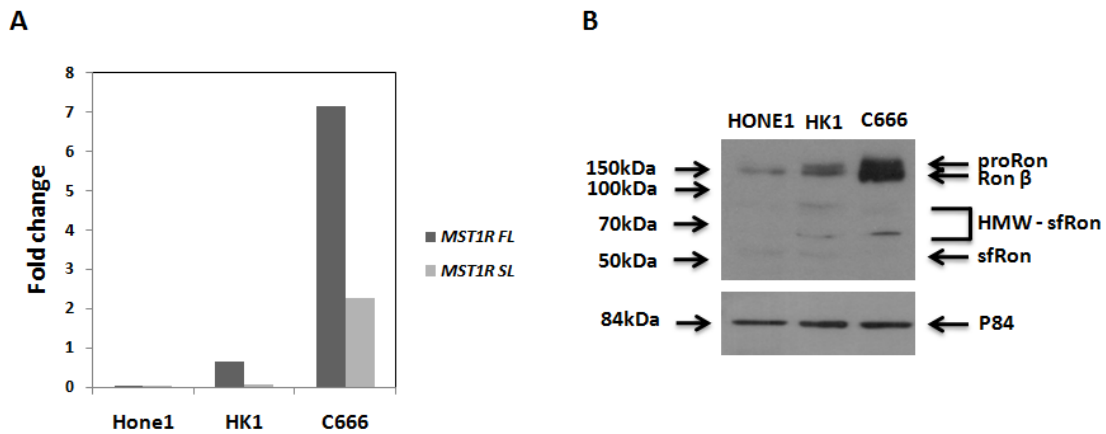

**Fig. S12:** Expression of two *MST1R* isoforms measured by QPCR and Western blotting in NPC cell lines HONE1, HK1, and C666. A: Expression of two *MST1R* transcripts measured by QPCR. *MST1R FL* is the full-length *MST1R* and *MST1R SF* is the *MST1R* short isoform. The average expression in the immortalized NP cell lines NP69 and NP460 was used as the reference for calculating the fold change. Overexpression of two transcripts were detected in C666. The experiments were done in triplicates. B: Expression of *MST1R* at the protein level detected by anti-*RON*  $\beta$  polyclonal antibody (C-20, 1:500 dilution) in NPC cell lines HONE1, HK1, and C666. The putative ubiquitinated sfRON (HMW-sfRON) is also noted. The p84 was used as a loading control.

LightSNiP assay: melting curve analysis

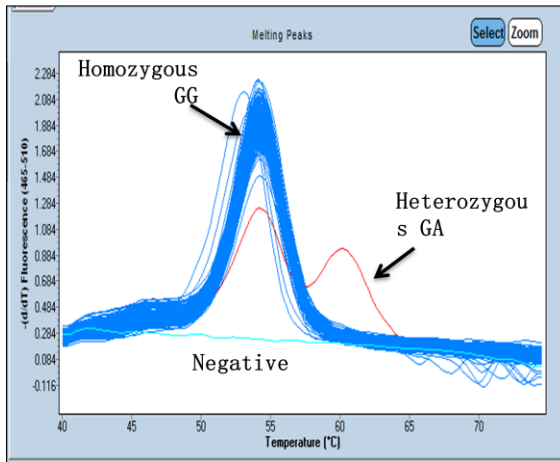

Sanger sequencing

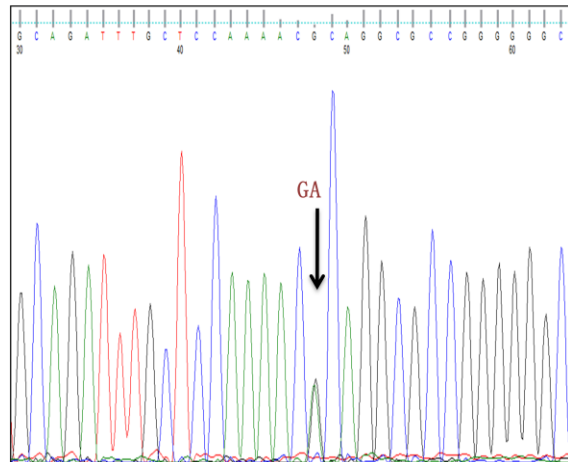

**Fig. S13:** The LightSNiP assay designed for detecting the variant c.G917A:p.R306H in the validation study (left). Water was used as a negative control. The variant was further validated by Sanger sequencing (right).



Table S1: Clinical information of NPC patients and overview of WES statistics

| Index | Sample ID | Group | % unique reads | % off-target bases | Average coverage | % Coverage 10X | % Coverage 20X | % Coverage 30X | % Coverage 50X | DNA input (ng) | Gender | Age | Stage | Source           |
|-------|-----------|-------|----------------|--------------------|------------------|----------------|----------------|----------------|----------------|----------------|--------|-----|-------|------------------|
| 1     | ST_1      | EAO   | 88.8           | 19.2               | 55.4             | 90.5           | 80.2           | 65.8           | 39.6           | 250            | F      | 15  | IV    | Shantou, China   |
| 2     | ST_2      | EAO   | 91.0           | 17.9               | 47.6             | 90.9           | 81.5           | 67.3           | 37.0           | 250            | M      | 15  | II    | Shantou, China   |
| 3     | ST_3      | EAO   | 90.4           | 18.4               | 43.6             | 90.3           | 79.8           | 64.4           | 32.7           | 250            | M      | 15  | IV    | Shantou, China   |
| 4     | ST_4      | EAO   | 90.1           | 17.8               | 46.2             | 90.6           | 81.4           | 67.6           | 37.0           | 250            | M      | 18  | IV    | Shantou, China   |
| 5     | ST_5      | EAO   | 90.2           | 18.2               | 48.4             | 90.9           | 82.3           | 68.9           | 38.5           | 250            | F      | 17  | IV    | Shantou, China   |
| 6     | ST_6      | EAO   | 91.4           | 17.5               | 50.5             | 90.5           | 80.6           | 65.7           | 37.5           | 250            | F      | 16  | III   | Shantou, China   |
| 7     | ST_7      | EAO   | 91.4           | 18.0               | 57.1             | 90.9           | 80.9           | 66.6           | 41.0           | 250            | M      | 20  | III   | Shantou, China   |
| 8     | GX_1      | EAO   | 91.9           | 17.9               | 55.5             | 90.1           | 79.3           | 64.4           | 39.3           | 250            | M      | 19  | IV    | Guangxi, China   |
| 9     | GX_2      | EAO   | 92.3           | 19.2               | 52.6             | 89.7           | 78.5           | 63.4           | 37.7           | 250            | M      | 19  | III   | Guangxi, China   |
| 10    | HK_1      | EAO   | 84.3           | 15.1               | 63.1             | 86.7           | 81.2           | 74.3           | 56.7           | 1000           | F      | 20  | III   | Hong Kong, China |
| 11    | HK_2      | EAO   | 86.0           | 15.1               | 64.9             | 88.6           | 83.6           | 77.0           | 58.9           | 1000           | F      | 12  | IV    | Hong Kong, China |
| 12    | HK_3      | EAO   | 95.2           | 23.0               | 52.1             | 89.1           | 81.7           | 70.1           | 42.5           | 250            | M      | 16  | I     | Hong Kong, China |
| 13    | HK_4      | EAO   | 90.1           | 21.8               | 46.1             | 87.6           | 70.5           | 52.5           | 30.0           | 250            | M      | 18  | III   | Hong Kong, China |
| 14    | HK_5      | EAO   | 90.1           | 18.8               | 48.8             | 86.7           | 69.4           | 52.6           | 31.5           | 250            | M      | 19  | II    | Hong Kong, China |
| 15    | HK_6*     | EAO   | 90.3           | 19.2               | 41.3             | 86.8           | 68.4           | 49.4           | 26.4           | 250            | F      | 19  | III   | Hong Kong, China |
| 16    | HK_7      | EAO   | 89.1           | 19.7               | 47.3             | 86.8           | 69.3           | 52.0           | 30.5           | 250            | M      | 12  | III   | Hong Kong, China |
| 17    | HK_8*     | EAO   | 89.6           | 22.5               | 47.8             | 86.6           | 69.6           | 52.9           | 31.4           | 250            | M      | 19  | II    | Hong Kong, China |
| 18    | HK_9      | EAO   | 94.6           | 19.0               | 41.2             | 87.5           | 72.8           | 54.8           | 27.4           | 250            | M      | 16  | IV    | Hong Kong, China |
| 19    | HK_10     | EAO   | 94.2           | 20.0               | 43.9             | 88.2           | 73.7           | 55.9           | 29.7           | 250            | F      | 19  | III   | Hong Kong, China |
| 20    | HK_11     | EAO   | 94.6           | 19.5               | 41.8             | 87.3           | 70.7           | 52.2           | 27.3           | 250            | M      | 19  | III   | Hong Kong, China |
| 21    | HK_12     | EAO   | 85.0           | 15.2               | 59.6             | 88.4           | 82.9           | 75.3           | 55.1           | 1000           | F      | 17  | IV    | Hong Kong, China |
| 22    | HK_13     | EAO   | 89.2           | 17.3               | 57.0             | 91.8           | 85.2           | 75.0           | 48.2           | 250            | F      | 18  | III   | Hong Kong, China |
| 23    | HK_14     | EAO   | 86.3           | 17.2               | 54.9             | 88.1           | 74.3           | 58.6           | 36.0           | 250            | M      | 13  | III   | Hong Kong, China |
| 24    | HK_15*    | EAO   | 86.3           | 17.1               | 49.1             | 88.1           | 73.5           | 56.9           | 33.1           | 250            | M      | 13  | IV    | Hong Kong, China |
| 25    | HK_16*    | EAO   | 86.3           | 17.1               | 49.5             | 87.7           | 72.9           | 56.3           | 33.1           | 250            | M      | 18  | III   | Hong Kong, China |
| 26    | HK_17     | EAO   | 82.8           | 14.8               | 47.5             | 87.5           | 79.3           | 68.1           | 41.9           | 1000           | M      | 20  | III   | Hong Kong, China |
| 27    | HK_18     | EAO   | 86.7           | 15.5               | 56.2             | 88.0           | 81.4           | 72.7           | 50.8           | 1000           | M      | 14  | III   | Hong Kong, China |
| 28    | HK_19     | EAO   | 85.6           | 14.8               | 40.5             | 86.0           | 75.3           | 60.8           | 31.1           | 1000           | M      | 15  | III   | Hong Kong, China |
| 29    | HK_20     | EAO   | 84.8           | 15.1               | 55.6             | 85.7           | 78.8           | 70.2           | 49.7           | 1000           | M      | 16  | IV    | Hong Kong, China |
| 30    | HK_21     | EAO   | 83.8           | 15.9               | 47.4             | 84.4           | 75.9           | 65.1           | 41.2           | 1000           | M      | 17  | IV    | Hong Kong, China |
| 31    | HK_22     | EAO   | 88.3           | 16.6               | 65.2             | 87.5           | 82.1           | 75.2           | 57.4           | 1000           | M      | 17  | III   | Hong Kong, China |
| 32    | HK_23     | EAO   | 80.4           | 15.2               | 44.8             | 86.7           | 77.9           | 65.8           | 38.2           | 1000           | M      | 12  | III   | Hong Kong, China |
| 33    | FJ_1      | EAO   | 90.9           | 17.9               | 44.9             | 87.7           | 72.0           | 54.1           | 29.9           | 250            | M      | 18  | III   | Fujian, China    |
| 34    | FJ_2      | EAO   | 90.5           | 17.6               | 49.4             | 88.8           | 75.6           | 59.0           | 33.8           | 250            | F      | 17  | II    | Fujian, China    |
| 35    | FJ_3      | EAO   | 90.4           | 18.0               | 46.7             | 88.5           | 74.9           | 57.9           | 32.0           | 250            | M      | 16  | III   | Fujian, China    |
| 36    | FJ_4      | EAO   | 90.9           | 18.3               | 45.7             | 88.1           | 73.7           | 56.2           | 30.8           | 250            | M      | 11  | IV    | Fujian, China    |
| 37    | FJ_5      | EAO   | 90.8           | 18.6               | 46.8             | 87.9           | 73.1           | 55.7           | 31.3           | 250            | M      | 12  | III   | Fujian, China    |
| 38    | FJ_6      | EAO   | 90.9           | 17.5               | 46.1             | 88.2           | 73.7           | 56.1           | 31.0           | 250            | F      | 20  | III   | Fujian, China    |
| 39    | FJ_7      | EAO   | 91.3           | 18.4               | 47.6             | 88.8           | 75.7           | 59.2           | 33.2           | 250            | M      | 20  | II    | Fujian, China    |
| 40    | HK1_FH_1  | FH+   | 88.2           | 15.8               | 75.9             | 88.7           | 84.6           | 79.3           | 64.9           | 1000           | F      | 55  | N/A   | Hong Kong, China |
| 41    | HK1_FH_2  | FH+   | 90.3           | 15.8               | 35.7             | 84.4           | 62.8           | 43.0           | 21.5           | 1000           | F      | 77  | III   | Hong Kong, China |
| 42    | HK1_FH_3  | FH+   | 94.9           | 16.8               | 45.2             | 89.1           | 80.4           | 66.7           | 35.1           | 1000           | M      | 40  | I     | Hong Kong, China |
| 43    | HK1_FH_4  | FH+   | 95.5           | 16.9               | 51.9             | 89.9           | 82.7           | 70.9           | 41.5           | 1000           | M      | 33  | II    | Hong Kong, China |
| 44    | HK2_FH_1  | FH+   | 88.7           | 17.1               | 54.9             | 86.5           | 79.1           | 69.7           | 47.9           | 1000           | M      | 59  | III   | Hong Kong, China |
| 45    | HK2_FH_2  | FH+   | 95.2           | 17.7               | 56.0             | 90.1           | 83.9           | 73.9           | 47.6           | 1000           | M      | 59  | N/A   | Hong Kong, China |
| 46    | HK3_FH_1  | FH+   | 94.8           | 14.9               | 56.5             | 90.5           | 84.2           | 73.6           | 45.4           | 1000           | M      | 39  | III   | Hong Kong, China |
| 47    | HK3_FH_2  | FH+   | 95.1           | 17.3               | 51.2             | 89.9           | 83.3           | 72.1           | 42.2           | 1000           | F      | 48  | III   | Hong Kong, China |
| 48    | HK4_FH_1  | FH+   | 95.3           | 14.7               | 52.2             | 90.3           | 83.3           | 71.7           | 42.0           | 1000           | M      | 40  | III   | Hong Kong, China |
| 49    | HK4_FH_2  | FH+   | 95.0           | 14.0               | 58.7             | 90.6           | 85.3           | 76.2           | 49.5           | 1000           | F      | 34  | IIb   | Hong Kong, China |
| 50    | HK5_FH_1  | FH+   | 95.6           | 16.6               | 55.3             | 90.5           | 84.8           | 74.7           | 46.1           | 1000           | F      | 39  | III   | Hong Kong, China |
| 51    | HK5_FH_2  | FH+   | 95.5           | 16.4               | 53.0             | 90.4           | 83.6           | 72.5           | 43.6           | 1000           | M      | 39  | IVA   | Hong Kong, China |
| 52    | HK6_FH_2  | FH+   | 95.3           | 24.6               | 59.1             | 90.0           | 84.6           | 75.3           | 49.4           | 1000           | F      | 62  | III   | Hong Kong, China |
| 53    | HK7_FH_1  | FH+   | 94.8           | 14.4               | 50.3             | 89.9           | 82.4           | 70.2           | 40.2           | 1000           | M      | 41  | III   | Hong Kong, China |
| 54    | HK7_FH_2  | FH+   | 95.0           | 15.8               | 54.3             | 90.2           | 83.4           | 72.1           | 43.2           | 1000           | M      | 40  | II    | Hong Kong, China |
| 55    | HK8_FH_1  | FH+   | 91.5           | 23.0               | 36.1             | 84.8           | 64.2           | 44.4           | 21.7           | 1000           | M      | 55  | II    | Hong Kong, China |
| 56    | HK8_FH_2  | FH+   | 90.4           | 18.4               | 42.6             | 76.9           | 56.2           | 42.2           | 26.5           | 1000           | M      | 46  | III   | Hong Kong, China |
| 57    | ZS1_FH_1  | FH+   | 84.4           | 15.9               | 47.5             | 85.0           | 76.5           | 65.6           | 41.4           | 1000           | M      | 40  | N/A   | Zhongshan, China |
| 58    | ZS1_FH_2  | FH+   | 83.7           | 16.1               | 46.0             | 84.6           | 75.5           | 64.0           | 39.1           | 1000           | M      | 44  | N/A   | Zhongshan, China |
| 59    | ZS2_FH_1  | FH+   | 85.5           | 17.1               | 45.7             | 86.7           | 78.1           | 66.2           | 38.1           | 1000           | F      | 47  | N/A   | Zhongshan, China |
| 60    | HK9_FH_1  | FH+   | 91.3           | 19.8               | 53.7             | 87.5           | 80.7           | 71.1           | 47.3           | 1000           | M      | 40  | IV    | Hong Kong, China |
| 61    | HK10_FH_1 | FH+   | 91.8           | 17.2               | 49.2             | 86.6           | 78.9           | 68.0           | 42.2           | 1000           | F      | 43  | III   | Hong Kong, China |
| 62    | HK11_FH_1 | FH+   | 88.3           | 14.9               | 60.5             | 87.8           | 81.8           | 73.7           | 53.3           | 1000           | F      | 44  | III   | Hong Kong, China |
| 63    | HK_FH_12  | FH+   | 91.1           | 18.5               | 39.7             | 86.5           | 68.1           | 48.7           | 25.1           | 250            | M      | 36  | IV    | Hong Kong, China |
| 64    | HK_FH_13  | FH+   | 92.2           | 22.9               | 35.6             | 83.3           | 60.2           | 41.0           | 21.2           | 250            | F      | 32  | I     | Hong Kong, China |
| 65    | HK_FH_14  | FH+   | 90.6           | 16.3               | 38.5             | 82.3           | 60.3           | 42.5           | 23.7           | 250            | M      | 37  | II    | Hong Kong, China |
| 66    | HK_FH_15  | FH+   | 90.7           | 18.5               | 45.5             | 88.0           | 72.5           | 54.5           | 30.2           | 250            | F      | 34  | III   | Hong Kong, China |
| 67    | HK_FH_16  | FH+   | 92.2           | 20.6               | 35.3             | 84.3           | 62.5           | 42.4           | 20.7           | 250            | M      | 53  | I     | Hong Kong, China |
| 68    | HK_FH_17  | FH+   | 91.8           | 19.8               | 41.8             | 85.9           | 67.2           | 48.6           | 26.4           | 250            | M      | 45  | III   | Hong Kong, China |
| 69    | HK_FH_18  | FH+   | 90.6           | 20.6               | 46.3             | 85.3           | 66.5           | 49.5           | 29.4           | 250            | M      | 36  | III   | Hong Kong, China |
| 70    | HK_FH_19  | FH+   | 90.8           | 19.5               | 39.6             | 85.8           | 66.6           | 47.5           | 24.9           | 250            | M      | 39  | III   | Hong Kong, China |
| 71    | HK_FH_20  | FH+   | 91.1           | 17.7               | 34.8             | 82.9           | 60.7           | 41.3           | 20.4           | 250            | M      | 37  | III   | Hong Kong, China |
| 72    | HK_FH_21  | FH+   | 90.0           | 18.8               | 48.0             | 87.8           | 71.8           | 54.2           | 31.4           | 250            | M      | 23  | II    | Hong Kong, China |
| 73    | HK_FH_22  | FH+   | 90.9           | 16.3               | 38.2             | 83.4           | 61.8           | 43.2           | 23.4           | 250            | F      | 41  | III   | Hong Kong, China |
| 74    | HK_FH_23  | FH+   | 90.6           | 16.4               | 41.8             | 85.0           | 65.2           | 47.0           | 26.3           | 250            | F      | 42  | IV    | Hong Kong, China |
| 75    | HK_FH_24  | FH+   | 90.2           | 16.3               | 36.6             | 84.0           | 63.1           | 44.0           | 22.4           | 250            | M      | 33  | II    | Hong Kong, China |
| 76    | HK_FH_24  | FH+   | 91.9           | 19.2               | 44.3             | 82.3           | 61.2           | 45.0           | 27.4           | 250            | M      | 31  | III   | Hong Kong, China |
| 77    | HK_FH_26  | FH+   | 89.9           | 16.3               | 40.7             | 84.8           | 64.9           | 46.7           | 25.9           | 250            | M      | 36  | III   | Hong Kong, China |
| 78    | HK_FH_28  | FH+   | 91.0           | 16.5               | 42.9             | 80.9           | 59.5           | 43.9           | 26.7           | 250            | M      | 38  | IV    | Hong Kong, China |
| 79    | HK_FH_29  | FH+   | 90.5           | 17.0               | 40.7             | 75.3           | 54.6           | 40.7           | 25.2           | 250            | M      | 38  | III   | Hong Kong, China |
| 80    | HK_FH_30  | FH+   | 91.4           | 19.3               | 31.5             | 82.9           | 59.2           | 38.3           | 17.0           | 250            | M      | 36  | III   | Hong Kong, China |
| 81    | HK_FH_31  | FH+   | 91.3           | 18.3               | 42.1             | 82.7           | 62.4           | 45.8           | 26.6           | 250            | F      | 28  | N/A   | Hong Kong, China |
| 82    | HK_FH_32  | FH+   | 90.5           | 20.7               | 58.6             | 87.4           | 72.6           | 58.0           | 37.9           | 250            | M      | 36  | III   | Hong Kong, China |
| 83    | HK_FH_33  | FH+   | 90.9           | 18.0               | 36.0             | 83.7           | 61.5           | 42.1           | 21.5           | 250            | M      | 27  | III   | Hong Kong, China |
| 84    | HK_FH_34  | FH+   | 90.6           | 18.7               | 45.4             | 84.2           | 64.2           | 47.3           | 28.3           | 250            | M      | 35  | III   | Hong Kong, China |
| 85    | HK_FH_35  | FH+   | 91.7           | 20.4               | 42.7             | 83.8           | 63.3           | 45.9           | 26.6           | 250            | M      | 34  | III   | Hong Kong, China |
| 86    | HK_FH_36  | FH+   | 89.8           | 16.1               | 43.6             | 86.0           | 75.8           | 62.1           | 34.0           | 1000           | M      | 58  | IVA   | Hong Kong, China |
| 87    | HK_FH_37  | FH+   | 88.6           | 14.8               | 62.7             | 87.4           | 81.2           | 73.3           | 54.2           | 1000           | F      | 39  | III   | Hong Kong, China |
| 88    | HK_FH_38  | FH+   | 88.7           | 15.1               | 51.1             | 85.9           | 77.8           | 67.3           | 44.0           | 1000           | F      | 45  | III   | Hong Kong, China |
| 89    | HK_FH_39  | FH+   | 88.1           | 15.7               | 48.4             | 87.2           | 78.7           | 66.9           | 40.5           | 1000           | M      | 58  | III   | Hong Kong, China |
| 90    | HK_FH_40  | FH+   | 87.9           | 17.8               | 52.1             | 87.4           | 80.1           | 70.1           | 45.8           | 1000           | M      | 54  | II    | Hong Kong, China |
| 91    | HK_FH_41  | FH+   | 85.3           | 16.2               | 44.6             | 85.0           | 75.7           | 63.6           | 36.9           | 1000           | M      | 43  | II    | Hong Kong, China |
| 92    | HK_FH_42  | FH+   | 87.3           | 17.0               | 42.1             | 84.5           | 74.5           | 61.3           | 33.0           | 1000           | F      | 45  | IV    | Hong Kong, China |
| 93    | HK_FH_43  | FH+   | 89.1           | 15.7               | 55.3             | 86.9           | 79.9           | 70.7           | 49.0           | 1000           | M      | 34  | III   | Hong Kong, China |
| 94    | HK_FH_44  | FH+   | 85.0           | 15.0               | 48.5             | 86.1           | 78.5           | 67.9           | 43.0           | 1000           | F      | 59  | I     | Hong Kong, China |
| 95    | HK_FH_45  | FH+   | 86.8           | 15.3               | 52.9             | 86.9           | 79.9           | 70.4           | 47.6           | 1000           | M      | 40  | II    | Hong Kong, China |
| 96    | HK_FH_46  | FH+   | 86.2           | 18.3               | 49.7             | 86.5           | 79.2           | 68.9           | 44.4           | 1000           | F      | 42  | II    | Hong Kong, China |
| 97    | HK_FH_47  | FH+   | 90.8           |                    |                  |                |                |                |                |                |        |     |       |                  |

|     |            |          |      |      |      |      |      |      |      |      |   |    |     |                  |
|-----|------------|----------|------|------|------|------|------|------|------|------|---|----|-----|------------------|
| 98  | HK_FH_48   | FH+      | 90.0 | 14.8 | 65.6 | 88.4 | 83.0 | 75.8 | 57.5 | 1000 | M | 39 | III | Hong Kong, China |
| 99  | HK_FH_49   | FH+      | 91.3 | 17.2 | 66.0 | 89.2 | 84.3 | 77.6 | 58.7 | 1000 | M | 55 | II  | Hong Kong, China |
| 100 | HK_FH_50   | FH+      | 92.1 | 17.2 | 53.5 | 88.3 | 81.7 | 72.0 | 46.9 | 1000 | F | 34 | II  | Hong Kong, China |
| 101 | HK_FH_51   | FH+      | 88.1 | 20.1 | 59.1 | 87.5 | 81.7 | 73.7 | 52.4 | 1000 | F | 60 | IV  | Hong Kong, China |
| 102 | ZS_FH_3    | FH+      | 81.8 | 16.6 | 44.8 | 86.2 | 77.8 | 66.0 | 38.0 | 1000 | F | 27 | N/A | Zhongshan, China |
| 103 | NPCHKE1_N  | sporadic | 87.7 | 20.6 | 40.4 | 87.5 | 73.2 | 55.6 | 26.8 | 250  | F | 40 | I   | Hong Kong, China |
| 104 | NPCHKE2_N  | sporadic | 89.7 | 19.3 | 48.5 | 89.2 | 76.7 | 59.9 | 33.4 | 250  | F | 57 | I   | Hong Kong, China |
| 105 | NPCHKE3_N  | sporadic | 88.4 | 17.6 | 49.6 | 88.0 | 73.1 | 56.1 | 32.8 | 250  | M | 48 | I   | Hong Kong, China |
| 106 | NPCHKE4_N  | sporadic | 92.5 | 17.8 | 57.9 | 90.1 | 79.5 | 65.0 | 40.4 | 250  | M | 40 | I   | Hong Kong, China |
| 107 | NPCHKE5_N  | sporadic | 88.7 | 20.1 | 43.3 | 88.8 | 76.1 | 59.5 | 30.5 | 250  | M | 58 | I   | Hong Kong, China |
| 108 | NPCHKE6_N  | sporadic | 86.3 | 17.0 | 50.0 | 88.0 | 74.3 | 58.2 | 34.2 | 250  | M | 63 | I   | Hong Kong, China |
| 109 | NPCHKE7_N  | sporadic | 86.4 | 16.8 | 58.6 | 88.5 | 75.2 | 60.0 | 38.0 | 250  | F | 69 | II  | Hong Kong, China |
| 110 | NPCHKE8_N  | sporadic | 90.3 | 16.7 | 48.3 | 90.8 | 81.5 | 66.9 | 36.6 | 250  | F | 55 | II  | Hong Kong, China |
| 111 | NPCHKE9_N  | sporadic | 92.7 | 18.6 | 54.1 | 90.0 | 79.4 | 64.7 | 39.1 | 250  | M | 64 | II  | Hong Kong, China |
| 112 | NPCHKE10_N | sporadic | 89.6 | 19.0 | 43.3 | 86.9 | 68.8 | 50.4 | 27.9 | 250  | M | 82 | II  | Hong Kong, China |
| 113 | NPCHKE11_N | sporadic | 89.9 | 20.7 | 52.6 | 88.0 | 72.1 | 55.1 | 33.4 | 250  | M | 62 | II  | Hong Kong, China |
| 114 | NPCHKE12_N | sporadic | 89.6 | 22.5 | 47.8 | 86.6 | 69.6 | 52.9 | 31.4 | 250  | M | 20 | II  | Hong Kong, China |
| 115 | NPCHKE13_N | sporadic | 94.3 | 19.6 | 43.9 | 87.9 | 72.2 | 54.2 | 29.2 | 250  | M | 38 | II  | Hong Kong, China |
| 116 | NPCHKE14_N | sporadic | 94.3 | 18.9 | 49.0 | 89.2 | 76.4 | 60.2 | 34.3 | 250  | M | 67 | II  | Hong Kong, China |
| 117 | NPCHKE15_N | sporadic | 86.2 | 16.7 | 53.6 | 88.6 | 75.3 | 59.6 | 36.2 | 250  | M | 55 | II  | Hong Kong, China |
| 118 | NPCHKE16_N | sporadic | 94.5 | 20.1 | 42.4 | 88.0 | 72.9 | 54.6 | 28.1 | 250  | F | 39 | III | Hong Kong, China |
| 119 | NPCHKE17_N | sporadic | 93.5 | 19.1 | 51.2 | 89.2 | 77.2 | 61.6 | 36.1 | 250  | F | 38 | III | Hong Kong, China |
| 120 | NPCHKE18_N | sporadic | 88.1 | 20.8 | 45.2 | 88.6 | 76.2 | 59.8 | 31.8 | 250  | F | 42 | III | Hong Kong, China |
| 121 | NPCHKE19_N | sporadic | 89.2 | 18.6 | 44.2 | 87.2 | 70.7 | 52.5 | 28.7 | 250  | M | 58 | III | Hong Kong, China |
| 122 | NPCHKE20_N | sporadic | 90.1 | 18.6 | 39.4 | 87.7 | 71.6 | 52.2 | 25.2 | 250  | M | 48 | III | Hong Kong, China |
| 123 | NPCHKE21_N | sporadic | 89.7 | 18.8 | 43.3 | 87.5 | 71.1 | 52.6 | 28.2 | 250  | M | 64 | III | Hong Kong, China |
| 124 | NPCHKE22_N | sporadic | 89.1 | 19.5 | 50.3 | 89.1 | 75.5 | 58.7 | 33.7 | 250  | M | 60 | III | Hong Kong, China |
| 125 | NPCHKE23_N | sporadic | 89.8 | 22.1 | 46.5 | 88.3 | 72.9 | 54.9 | 30.4 | 250  | M | 56 | III | Hong Kong, China |
| 126 | NPCHKE24_N | sporadic | 88.8 | 19.9 | 51.2 | 86.2 | 69.4 | 53.1 | 32.5 | 250  | M | 64 | III | Hong Kong, China |
| 127 | NPCHKE25_N | sporadic | 93.8 | 19.3 | 48.3 | 88.5 | 74.8 | 58.2 | 33.2 | 250  | M | 49 | III | Hong Kong, China |
| 128 | NPCHKE26_N | sporadic | 93.8 | 18.6 | 52.7 | 89.6 | 78.5 | 63.8 | 38.0 | 250  | M | 51 | III | Hong Kong, China |
| 129 | NPCHKE27_N | sporadic | 88.0 | 19.0 | 57.5 | 90.8 | 81.6 | 68.4 | 42.3 | 250  | M | 48 | III | Hong Kong, China |
| 130 | NPCHKE28_N | sporadic | 94.5 | 22.6 | 39.9 | 86.9 | 70.7 | 52.1 | 25.7 | 250  | M | 43 | III | Hong Kong, China |
| 131 | NPCHKE29_N | sporadic | 89.3 | 17.5 | 49.8 | 88.5 | 74.6 | 57.9 | 33.5 | 250  | M | 58 | III | Hong Kong, China |
| 132 | NPCHKE30_N | sporadic | 94.2 | 18.9 | 47.5 | 88.0 | 73.4 | 56.7 | 32.3 | 250  | M | 65 | III | Hong Kong, China |
| 133 | NPCHKE31_N | sporadic | 94.1 | 21.7 | 47.9 | 89.0 | 76.0 | 59.5 | 33.3 | 250  | M | 47 | III | Hong Kong, China |
| 134 | NPCHKE32_N | sporadic | 94.2 | 17.8 | 48.6 | 89.3 | 77.2 | 61.4 | 34.7 | 250  | M | 63 | III | Hong Kong, China |
| 135 | NPCHKE33_N | sporadic | 89.5 | 23.6 | 39.1 | 87.1 | 70.2 | 50.6 | 24.5 | 250  | M | 37 | III | Hong Kong, China |
| 136 | NPCHKE34_N | sporadic | 89.1 | 19.5 | 51.5 | 89.7 | 78.1 | 62.5 | 36.2 | 250  | M | 48 | III | Hong Kong, China |
| 137 | NPCHKE35_N | sporadic | 90.2 | 18.7 | 45.6 | 88.3 | 73.0 | 54.7 | 29.9 | 250  | M | 61 | III | Hong Kong, China |
| 138 | NPCHKE36_N | sporadic | 90.1 | 17.8 | 51.8 | 89.5 | 76.9 | 60.8 | 35.3 | 250  | M | 37 | III | Hong Kong, China |
| 139 | NPCHKE37_N | sporadic | 94.3 | 21.0 | 47.0 | 88.3 | 74.0 | 57.1 | 32.1 | 250  | M | 52 | IV  | Hong Kong, China |
| 140 | NPCHKE38_N | sporadic | 94.4 | 19.1 | 46.4 | 88.9 | 76.2 | 59.5 | 32.5 | 250  | F | 64 | IV  | Hong Kong, China |
| 141 | NPCHKE39_N | sporadic | 93.8 | 18.3 | 52.8 | 89.8 | 79.2 | 64.7 | 38.5 | 250  | F | 38 | IV  | Hong Kong, China |
| 142 | NPCHKE40_N | sporadic | 85.4 | 16.2 | 73.6 | 93.1 | 88.9 | 82.6 | 63.8 | 250  | M | 49 | IV  | Hong Kong, China |
| 143 | NPCHKE41_N | sporadic | 87.3 | 19.2 | 53.0 | 90.4 | 80.5 | 66.5 | 39.3 | 250  | M | 62 | IV  | Hong Kong, China |
| 144 | NPCHKE42_N | sporadic | 88.9 | 18.7 | 47.2 | 89.6 | 78.1 | 62.4 | 34.1 | 250  | M | 46 | IV  | Hong Kong, China |
| 145 | NPCHKE43_N | sporadic | 89.5 | 19.4 | 52.0 | 89.4 | 76.6 | 60.3 | 35.2 | 250  | M | 55 | IV  | Hong Kong, China |
| 146 | NPCHKE44_N | sporadic | 89.1 | 18.9 | 49.9 | 88.8 | 74.6 | 57.4 | 33.0 | 250  | M | 60 | IV  | Hong Kong, China |
| 147 | NPCHKE45_N | sporadic | 82.8 | 13.7 | 57.9 | 85.8 | 73.8 | 61.6 | 42.1 | 250  | M | 29 | IV  | Hong Kong, China |
| 148 | NPCHKE46_N | sporadic | 88.9 | 18.3 | 49.4 | 89.2 | 77.0 | 61.1 | 34.7 | 250  | M | 49 | IV  | Hong Kong, China |
| 149 | NPCHKE47_N | sporadic | 94.3 | 26.6 | 34.3 | 85.0 | 64.9 | 44.3 | 19.9 | 250  | M | 68 | IV  | Hong Kong, China |
| 150 | NPCHKE48_N | sporadic | 88.8 | 18.5 | 47.2 | 87.9 | 72.9 | 55.3 | 31.2 | 250  | F | 58 | IV  | Hong Kong, China |
| 151 | NPCHKE49_N | sporadic | 90.0 | 19.1 | 55.7 | 91.8 | 84.1 | 72.1 | 44.5 | 250  | M | 62 | IV  | Hong Kong, China |
| 152 | NPCHKE50_N | sporadic | 90.3 | 18.8 | 55.6 | 88.8 | 74.7 | 58.7 | 36.4 | 250  | M | 50 | IV  | Hong Kong, China |
| 153 | NPCHKE51_N | sporadic | 89.9 | 17.8 | 65.8 | 92.5 | 86.8 | 78.0 | 54.7 | 250  | M | 48 | IV  | Hong Kong, China |
| 154 | CASE17_N   | sporadic | 94.7 | 17.4 | 37.2 | 85.2 | 65.9 | 46.5 | 22.9 | 250  | M | NA | N/A | Hong Kong, China |
| 155 | CASE20_N   | sporadic | 93.5 | 19.5 | 43.2 | 85.3 | 66.8 | 49.3 | 27.9 | 250  | M | NA | N/A | Hong Kong, China |
| 156 | CASE21_N   | sporadic | 94.2 | 21.9 | 38.2 | 84.2 | 63.9 | 45.5 | 23.9 | 250  | M | NA | N/A | Hong Kong, China |
| 157 | CASE22_N   | sporadic | 94.1 | 16.8 | 42.7 | 87.1 | 71.6 | 53.7 | 28.5 | 250  | M | NA | N/A | Hong Kong, China |
| 158 | CASE24_N   | sporadic | 94.5 | 16.5 | 37.7 | 84.5 | 64.7 | 45.9 | 23.5 | 250  | M | NA | N/A | Hong Kong, China |
| 159 | CASE27_N   | sporadic | 94.3 | 17.2 | 38.8 | 86.2 | 69.3 | 50.6 | 24.8 | 250  | M | NA | N/A | Hong Kong, China |
| 160 | CASE35_N   | sporadic | 92.1 | 19.5 | 52.3 | 89.9 | 78.9 | 63.8 | 37.7 | 250  | M | NA | N/A | Hong Kong, China |
| 161 | CASE36_N   | sporadic | 92.3 | 18.6 | 51.3 | 89.6 | 78.2 | 62.7 | 36.7 | 250  | M | NA | N/A | Hong Kong, China |

\* EAO cases with family history of NPC

N/A: Information is not available

**Table S2: Non-cancer controls used in gene-based burden test**

| Study                                     | # patients | Origin            |
|-------------------------------------------|------------|-------------------|
| Degenerative disc disease                 | 713        | Hong Kong Chinese |
| Congenital disorders                      | 111        | Hong Kong Chinese |
| Epilepsy                                  | 50         | Hong Kong Chinese |
| Healthy individuals from Red Cross        | 10         | Hong Kong Chinese |
| Healthy individuals from FH+ NPC families | 6          | Hong Kong Chinese |
| Healthy individuals from Fujian           | 5          | Southern Chinese  |
| Total                                     | 895        |                   |

**Table S3: Enrichment of the gene sets with deleterious variants in the EAO cases**

| Pathway Name                                   | Set Size | # Genes (%) | Genes*                                                                                                                                    | p-value  | q-value | Pathway Source |
|------------------------------------------------|----------|-------------|-------------------------------------------------------------------------------------------------------------------------------------------|----------|---------|----------------|
| Extracellular matrix organization              | 264      | 10 (3.8%)   | <u>SERPINH1</u> , COL6A1, <u>ITGAD</u> , <u>FBN2</u> , <u>TNC</u> , <u>COL7A1</u> , <u>DMD</u> , <u>COL18A1</u> , ADAMTS9, <b>COL12A1</b> | 5.71E-05 | 0.00526 | Reactome       |
| ABC transporters - Homo sapiens (human)        | 44       | 4 (9.1%)    | <u>ABCA1</u> , <u>ABCA2</u> , <u>ABCC11</u> , ABCG2                                                                                       | 0.000451 | 0.0207  | KEGG           |
| Ligand-receptor interactions                   | 8        | 2 (25.0%)   | <u>BOC</u> , <b>PTCH1</b>                                                                                                                 | 0.00181  | 0.0555  | Reactome       |
| Proteoglycans in cancer - Homo sapiens (human) | 204      | 6 (2.9%)    | <b>PTCH1</b> , <u>ITPR3</u> , FZD6, <b>FLNC</b> , <b>ANK2</b> , <b>PLCE1</b>                                                              | 0.00662  | 0.1     | KEGG           |
| DNA Repair                                     | 147      | 5 (3.4%)    | <u>ERCC2</u> , FANCA, LIG3, <u>POLE</u> , <u>FANCI</u>                                                                                    | 0.00718  | 0.1     | Reactome       |
| Transmembrane transport of small molecules     | 579      | 11 (1.9%)   | <u>SLC15A1</u> , TTYH3, ATP7B, ATP1A4, <u>ABCA2</u> , RYR3, <u>ABCC11</u> , <u>ANO9</u> , ABCG2, <b>CLCNKA</b> , SLC9A3                   | 0.00761  | 0.1     | Reactome       |

\*Genes with somatic mutation(s) in both the Hong Kong and Singapore cohorts are in **BOLD**. Genes with somatic mutation(s) found in only one cohort are underlined.

**Table S4: Genes with deleterious variants relevant to NPC genetic susceptibility and/or tumor development**

| Gene               | EAO patients % (n=39) | FH+ patients % (n=56*) | Sporadic patients % (n=59) | Function in NPC                                                                                                                  | Reference |
|--------------------|-----------------------|------------------------|----------------------------|----------------------------------------------------------------------------------------------------------------------------------|-----------|
| <b>ERCC2 (XPD)</b> | 10.3%                 | 3.6%                   | 1.7%                       | Single nucleotide polymorphism p.K751Q associated with decreased risk of NPC in Sichuan population and Malaysian population      | (6, 7)    |
| <b>ADAMTS9</b>     | 10.3%                 | 1.8%                   | 0%                         | Inhibition of tumor growth and colony formation in NPC cell lines; inhibition of angiogenesis by downregulation of MMP9 and VEGF | (8, 9)    |
| <b>PTPRG</b>       | 10.3%                 | 7.1%                   | 8.4%                       | Inhibition of tumor growth by induction of G0/G1 cell cycle arrest through downregulation of cyclin D1                           | (1)       |

\* Four EAO cases with family history of NPC were included in the analysis making a total of 56 independent FH+ families

**Table S5: Candidate genes in gene-based burden test with p<0.001 in two out of three tests**

| Index | Chromosome | Start     | End       | Gene           | Direction* | All controls n=895 |         |          | Controls without healthy individuals from NPC families n=889 |         |          |
|-------|------------|-----------|-----------|----------------|------------|--------------------|---------|----------|--------------------------------------------------------------|---------|----------|
|       |            |           |           |                |            | VT                 | SKAT    | CMC      | VT                                                           | SKAT    | CMC      |
| 1     | 3          | 49924751  | 49940666  | <i>MST1R</i>   | +          | 0.00092            | 0.02051 | 0.00026  | 0.00150                                                      | 0.02995 | 0.00037  |
| 2     | 14         | 23528501  | 23549346  | <i>ACIN1</i>   | +          | 0.00046            | 0.00021 | 0.00017  | 0.00026                                                      | 0.00005 | 0.00005  |
| 3     | 16         | 19020565  | 19067997  | <i>TMC7</i>    | +          | 0.00089            | 0.00224 | 0.00031  | 0.00064                                                      | 0.00209 | 0.00025  |
| 4     | 5          | 140593726 | 140595791 | <i>PCDHB13</i> | +          | 1.40E-06           | 0.00332 | 2.24E-06 | 8.00E-07                                                     | 0.00351 | 3.76E-06 |
| 5     | 3          | 46871967  | 46874502  | <i>PRSS42</i>  | +          | 0.00002            | 0.00034 | 0.00140  | 0.00002                                                      | 0.00084 | 0.00162  |
| 6     | 17         | 7977074   | 7984039   | <i>ALOX12B</i> | +          | 0.00005            | 0.01855 | 0.00019  | 0.00001                                                      | 0.00727 | 0.00006  |
| 7     | 11         | 64664250  | 64681911  | <i>ATG2A</i>   | +          | 0.00240            | 0.00008 | 0.00085  | 0.00670                                                      | 0.00062 | 0.00283  |
| 8     | 7          | 112090763 | 112102405 | <i>IFRD1</i>   | +          | 0.00056            | 0.00260 | 0.00032  | 0.00140                                                      | 0.00541 | 0.00052  |
| 9     | 16         | 85711859  | 85721107  | <i>GINS2</i>   | +          | 0.00060            | 0.00193 | 0.00033  | 0.00002                                                      | 0.00003 | 0.00001  |
| 10    | 8          | 6728214   | 6728230   | <i>DEFB1</i>   | +          | 0.00074            | 0.00535 | 0.00073  | 0.00110                                                      | 0.00590 | 0.00075  |
| 11    | 14         | 55836545  | 55844598  | <i>ATG14</i>   | +          | 0.00019            | 0.00004 | 0.00006  | 0.00092                                                      | 0.00046 | 0.00031  |
| 12    | 17         | 79870317  | 79872517  | <i>SIRT7</i>   | +          | 0.00120            | 0.00002 | 0.00044  | 0.00180                                                      | 0.00006 | 0.00112  |
| 13    | 17         | 73124834  | 73125065  | <i>ARMC7</i>   | +          | 0.00014            | 0.00006 | 0.00005  | 0.00036                                                      | 0.00037 | 0.00014  |
| 14    | 4          | 47901069  | 47912981  | <i>NFXL1</i>   | +          | 0.00150            | 0.00080 | 0.00054  | 0.00240                                                      | 0.00133 | 0.00088  |
| 15    | 9          | 37762066  | 37776324  | <i>TRMT10B</i> | +          | 0.00090            | 0.00024 | 0.00030  | 0.00150                                                      | 0.00036 | 0.00046  |

\*direction +: the rare deleterious variants are more frequently in NPC cases than in controls

**Table S6: Non-reference discrepancy rate of 0.996 in duplicates with 250 ng and 1000 ng input DNA**

|                          | A/A (250 ng) | A/B (250 ng) | B/B (250 ng) | no call (250 ng) |
|--------------------------|--------------|--------------|--------------|------------------|
| <b>A/A (1000 ng)</b>     |              | 54           | 2            | 18350            |
| <b>A/B (1000 ng)</b>     | 108          | 34592        | 28           | 1362             |
| <b>B/B (1000 ng)</b>     | 2            | 39           | 27233        | 1250             |
| <b>no call (1000 ng)</b> | 29834        | 2949         | 2576         |                  |

A: wild-type allele. B: mutant allele

**Table S7: PCR primers and conditions for Sanger sequencing for MST1R variants**

| Target | Assay   | PCR primers                                               | Size of amplicon (bp) | PCR condition                                     |
|--------|---------|-----------------------------------------------------------|-----------------------|---------------------------------------------------|
| R306H  | Assay 1 | forward 5'-GTCAATGGGGAAGGCACAGA-3'<br>(sequencing primer) | 247                   | 95°C 5 min                                        |
| A327T  |         | reverse 5'-GGGTGACTATCGGGAGCTG-3'                         |                       |                                                   |
| V670G  | Assay 2 | forward 5'-AAGCACTCTCCCTCCATCC-3'<br>(sequencing primer)  | 488                   | (95°C 30 sec, 60°C 30 sec, 72°C 30 sec)x30 cycles |
| E705K  |         | reverse 5'-TGCCCCGAAAGACTTTGTA-3'                         |                       |                                                   |
| A973T  | Assay 3 | forward 5'-CCTAAGTCCTGGGCAGAGAG-3'<br>(sequencing primer) | 188                   | 72°C 7 min                                        |
|        |         | reverse 5'-CCTTGGTATCCTGCTGCCTT-3'                        |                       |                                                   |

## References

1. Cheung AK, *et al.* (2008) Functional analysis of a cell cycle-associated, tumor-suppressive gene, protein tyrosine phosphatase receptor type G, in nasopharyngeal carcinoma. *Cancer Res* 68(19):8137-8145.
2. Cheung AK, *et al.* (2009) Chromosome 14 transfer and functional studies identify a candidate tumor suppressor gene, mirror image polydactyly 1, in nasopharyngeal carcinoma. *Proc Natl Acad Sci U S A* 106(34):14478-14483.
3. Angeloni D, *et al.* (2007) Hypermethylation of Ron proximal promoter associates with lack of full-length Ron and transcription of oncogenic short-Ron from an internal promoter. *Oncogene* 26(31):4499-4512.
4. Dai W, *et al.* (2015) Comparative methylome analysis in solid tumors reveals aberrant methylation at chromosome 6p in nasopharyngeal carcinoma. *Cancer Med*.
5. Lowe R & Rakyan VK (2013) Marmal-aid--a database for Infinium HumanMethylation450. *BMC Bioinformatics* 14:359.
6. Yang ZH, *et al.* (2007) Genetic polymorphisms of the DNA repair gene and risk of nasopharyngeal carcinoma. *DNA Cell Biol* 26(7):491-496.
7. Lin H, Lin D, & Zheng C (2014) Association of XPD Lys751Gln polymorphism with head and neck cancer susceptibility: evidence from 11,443 subjects. *Diagn Pathol* 9:15.
8. Lung HL, *et al.* (2008) Characterization of a novel epigenetically-silenced, growth-suppressive gene, ADAMTS9, and its association with lymph node metastases in nasopharyngeal carcinoma. *Int J Cancer* 123(2):401-408.
9. Lo PH, *et al.* (2010) Extracellular protease ADAMTS9 suppresses esophageal and nasopharyngeal carcinoma tumor formation by inhibiting angiogenesis. *Cancer Res* 70(13):5567-5576.
